# Supplementary material for: Water Scarcity under Various Socio-economic Pathways and its Potential Effects on Food Production in the Yellow River Basin
Source: Copernicus journal article supplement (doi:10.5194/hess-2016-188), 2016-04-25
Supplement: Supplementary file 1 [file hess-2016-188-supplement.pdf]

## Supplemental Figures:

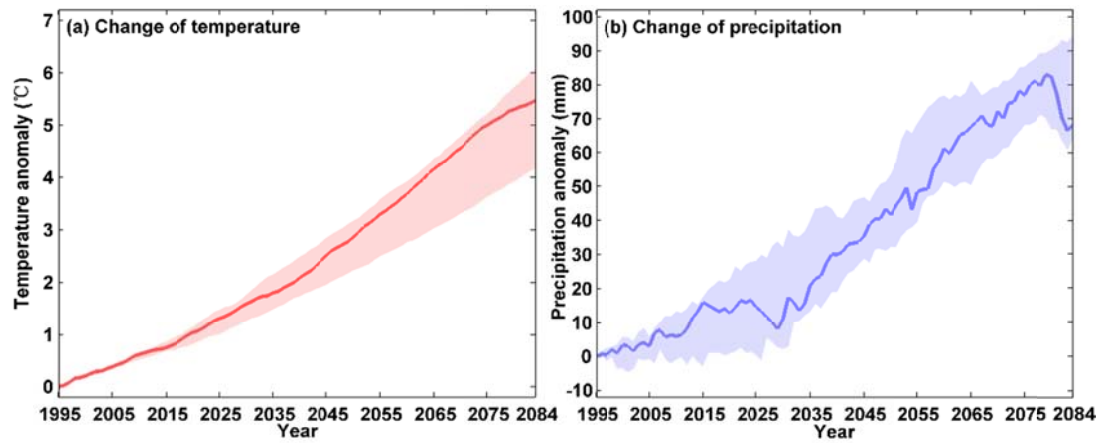

Figure S1 Change of (a) temperature and (b) precipitation from 1995-2084 with respect to 1981-2010 in the Yellow River (YR) basin under the RCP 8.5 emission scenario. The red (blue) shaded area denotes the interquartile range for the temperature (precipitation) anomaly and the solid line shows the median of the GCMs.

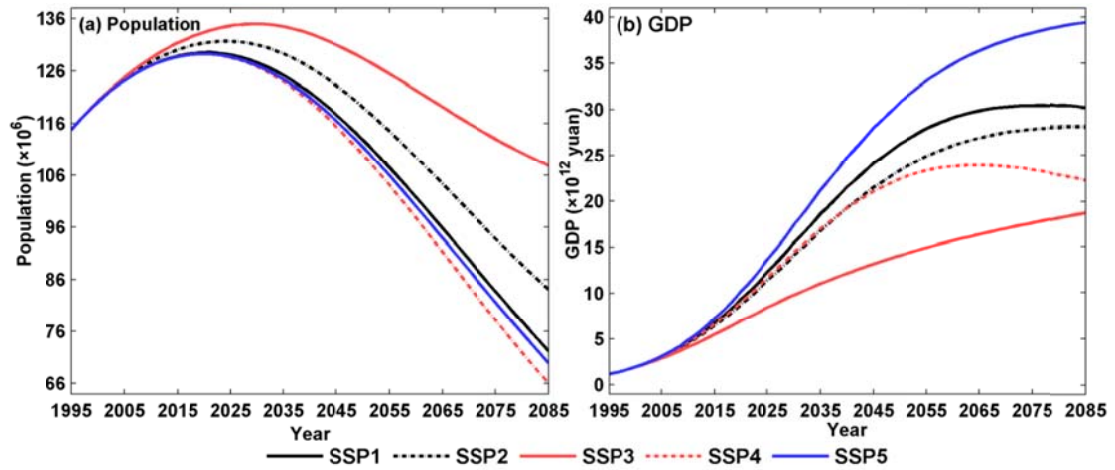

Figure S2 Population and gross domestic gross (GDP) from 1995-2085 in the Yellow River (YR) basin under SSP1, SSP2, SSP3, SSP4 and SSP5.

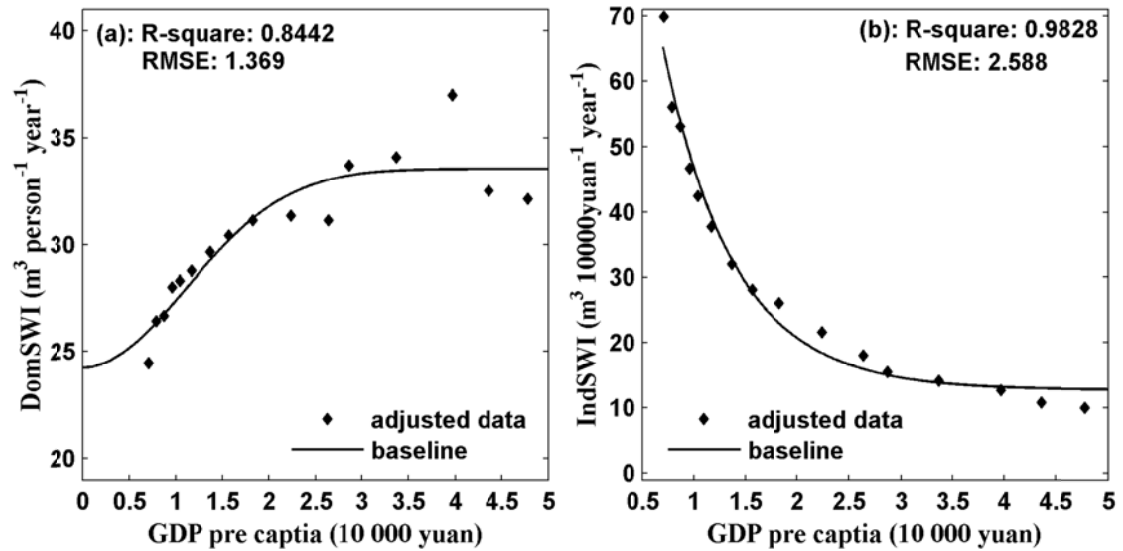

Figure S3 Structural changes in domestic water use intensity (DomSWI) (a) and industry water use intensity (IndSWI) (b) for the Yellow River (YR) basin.

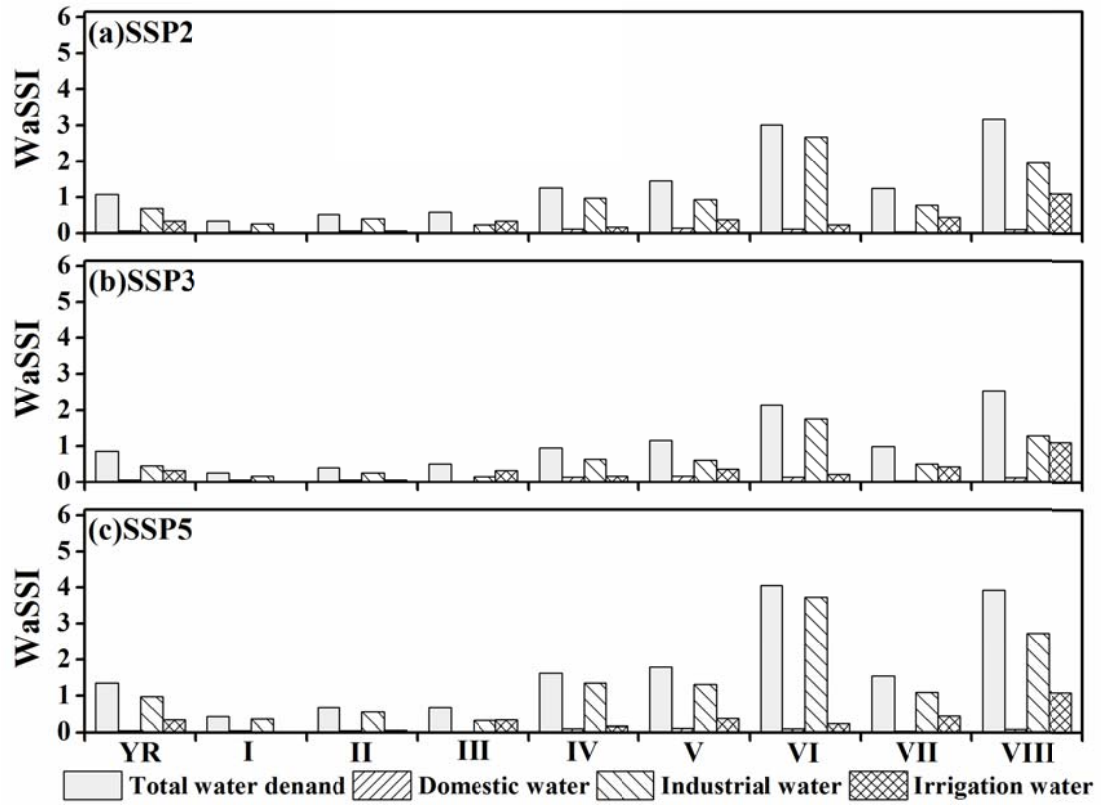

Figure S4 WaSSI for total water demand and for sectoral (domestic, industrial and irrigation) water demands for the Yellow River (YR) basin and eight sub-basins at the end of the 21<sup>st</sup> century under three different Shared Socio-Economic Pathways (SSPs) under RHWA70.

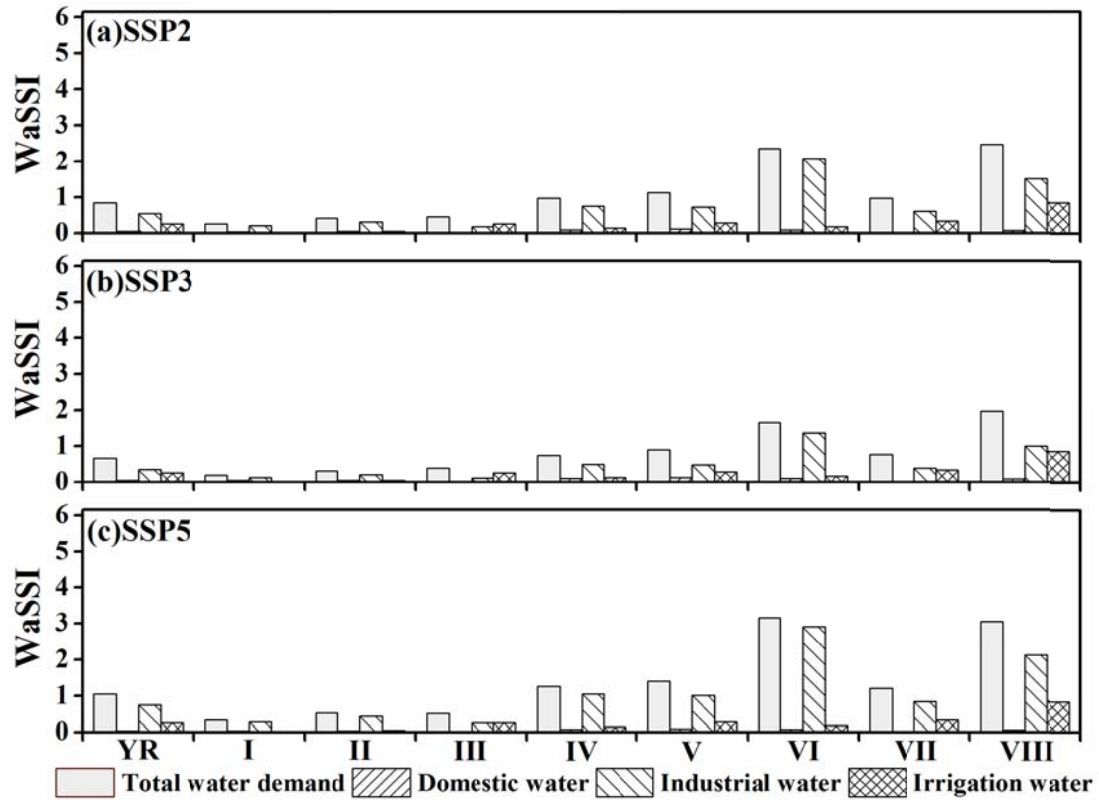

Figure S5 WaSSI for total water demand and for sectoral (domestic, industrial and irrigation) water demands for the Yellow River (YR) basin and eight sub-basins at the end of the 21<sup>st</sup> century under three different Shared Socio-Economic Pathways (SSPs) under RHWA90.

## Supplemental Tables:

Table S1 Main characteristics of the global gridded hydrological models (GGHMs) used in this study.

| Model name | Meteorological forcing <sup>a</sup>  | Energy balance | Evaporation scheme <sup>b</sup> | Runoff scheme <sup>c</sup>       | Snow scheme                             | Vegetation dynamics | CO <sub>2</sub> effect <sup>d</sup> | References                                                    |
|------------|--------------------------------------|----------------|---------------------------------|----------------------------------|-----------------------------------------|---------------------|-------------------------------------|---------------------------------------------------------------|
| H80        | R, S, T, W, Q, LW, SW, SP            | Yes            | Bulk formula                    | Saturation no-linear excess,     | Energy balance                          | No                  | No                                  | Hanasaki et al. (200a, 2008b)                                 |
| MPI-HM     | P, T, W, Q, LW <sub>n</sub> , SW, SP | No             | Penman-Monteith                 | Saturation no-linear excess,     | Degree Day                              | No                  | No                                  | Hagemann et al. (2003); Stacke et al. (2012)                  |
| PCR-GLBWB  | P, T                                 | No             | Hamon                           | Saturation excess, Beta function | Degree Day                              | No                  | No                                  | Wada et al. (2010); Van Beek et al (2001); Wada et al. (2011) |
| VIC        | P, T, W, Q, LW, SW, SP               | Only for snow  | Penman-Monteith                 | Saturation no-linear excess,     | Energy balance                          | No                  | No                                  | Liang et al. (1994); Lohmann and Raschke (1988)               |
| WaterGAP   | P, T, LW <sub>n</sub> , SW           | No             | Priestley-Taylor                | Beta function                    | Degree Day                              | No                  | No                                  | Döll et al. (2012); Flörke et al. (2013)                      |
| WBM        | P, T                                 | No             | Hamon                           | Saturation excess                | Empirical temp and precip based formula | No                  | No                                  | Vörösmarty et al. (1998); Wisser et al. (2010)                |

Note: a R: rainfall rate, S: snowfall rate, P: precipitation rate (rain and snow calculated in the model), T: air temperature, W: wind speed, Q: air specific humidity, LW:

downwellinglongwave

radiation; LW<sub>n</sub>: net longwave radiation; SW: downwelling shortwave radiation, SP: surface pressure.

b Bulk formula: Bulk transfer coefficients are used when calculating turbulent heat fluxes.

c Non-linear: Subsurface runoff is a non-linear function of soil moisture.

d CO<sub>2</sub> concentration in calculation of stomatal conductance.

Table S2 Main characteristics of the global gridded crop models (GGCMs) used in this study.

| Model name | Meteorological forcing <sup>a</sup> | Evapo-transpiration | Stresses <sup>b</sup>    | CO <sub>2</sub> effect <sup>c</sup>               | Yield function <sup>d</sup> | Institution                                                                                                                                           | References                                 |
|------------|-------------------------------------|---------------------|--------------------------|---------------------------------------------------|-----------------------------|-------------------------------------------------------------------------------------------------------------------------------------------------------|--------------------------------------------|
| EPIC       | Tmn, Tmx, P, Rad, RH, WS            | Penman-Monteith     | W, T, H, A, N, P, BD, Al | RUE, TE                                           | HI <sub>ws</sub> , PrtB     | BOKU, University of Natural Resources and Life Sciences, Vienna                                                                                       | Williams (1995); Izaurralde et al. (2006)  |
| GEPIC      | Tmn, Tmx, P, Rad, RH, WS            | Penman-Monteith     | W, T, H, A, N, P, BD, Al | RUE, TE                                           | HI <sub>ws</sub> , PrtB     | EAWAG, Swiss Federal Institute of Aquatic Science and Technology                                                                                      | Williams (1990); Liu et al. (2007)         |
| LPJmL      | Ta, P, Cld (or Rad)                 | Priestley-Taylor    | W, T                     | LF, SC                                            | HI <sub>ws</sub>            | Potsdam Institute for Climate Impact Research                                                                                                         | Bondeau et al. (2007); Fader et al. (2010) |
| LPJ-GUESS  | Ta, P, Cld (or Rad)                 | Priestley-Taylor    | W, T                     | LF, SC                                            | HI <sub>ws</sub>            | Lund University, Department for Physical Geography and Ecosystem Science, IMK-IFU, Karlsruhe Institute of Technology, Garmisch-Partenkirchen, Germany | Bondeau et al. (2007); Smith et al. (2011) |
| pDSSAT     | Tmn, Tmx, P, Rad                    | Priestley-Taylor    | W, T, H, A, N            | RUE (for wheat, rice, maize) and LF (for soybean) | Gn                          | University of Chicago Computation Institute                                                                                                           | Elliott et al. (2014); Jones et al. (2013) |
| PEGASUS    | Ta, Tmn, Tmx, P, Cld (or Sun)       | Priestley-Taylor    | W, T, H, N, P, K         | RUE                                               | Prt                         | Tyndall Centre University of East Anglia, UK/McGill University, Canada                                                                                | Deryng et al. (2011)                       |

Note: a Tmn: Minimum temperature, Tmx: Maximum temperature, P: Precipitation, Rad: Percentage of radiation, RH: Relative humidity, WS: Wind speed, Ta: Average temperature, Cld: Percentage of cloud cover, Sun: Fraction of sunshine hours

b W: water stress; T: temperature stress; H: specific-heat stress; A: oxygen stress; N: nitrogen stress; P: phosphorus stress; K: potassium stress; BD: bulk density; Al: aluminum stress (based on pH and base saturation)

c Elevated CO<sub>2</sub> effects: LF: Leaf-level photosynthesis (via rubisco or quantum-efficiency and leaf photosynthesis saturation; RUE: Radiation-use efficiency; TE: Transpiration efficiency; SC: stomatal conductance

d Yield formation depending on: HI: Fixed harvest-index; HI<sub>ws</sub>: HI modified by water stress; Prt: Partitioning during reproductive stages; B: Total (above-ground) biomass; Gn: Number of grains and grain growth rate

Table S3 Overview of global climate models (GCMs) used in this study.

|      | Name           | Institute                                                                                                                                                                 | References                                   |
|------|----------------|---------------------------------------------------------------------------------------------------------------------------------------------------------------------------|----------------------------------------------|
| GCMs | HadGEM2-ES     | Met Office Hadley Centre                                                                                                                                                  | Jones et al. (2011)                          |
|      | IPSL-CM5A-LR   | Institute Pierre-Simon Laplace                                                                                                                                            | Mignot et al. (2013)                         |
|      | MIROC-ESM-CHEM | Japan Agency for Marine-Earth Science and Technology, Atmosphere and Ocean Research Institute (The University of Tokyo), and National Institute for Environmental Studies | Watanabe et al. (2011)                       |
|      | GFDL-ESM2M     | Geophysical Fluid Dynamics Laboratory                                                                                                                                     | Dunne et al. (2012, 2013)                    |
|      | NorESM1-M      | Norwegian Climate Centre                                                                                                                                                  | Bentsen et al. (2013); Iversen et al. (2013) |

Table S4 Comparisons of average annual runoff between the observations and estimates of seven GGHM at the selected hydrological stations during 1971-2000 in billion m<sup>3</sup> per year.

| Hydrological stations | Lanzhou | Longmen | Sanmenxia | Huayuankou |
|-----------------------|---------|---------|-----------|------------|
| Observation           | 32.74   | 37.59   | 47.81     | 53.04      |
| GGHM-GCMs             | 38.9    | 47.32   | 64.41     | 68.79      |
| H08                   | 49.11   | 59.24   | 78.17     | 82.17      |
| MPI-HM                | 12.26   | 14.3    | 25.18     | 28.21      |
| PCR-GLOBWB            | 63.25   | 82.12   | 117.38    | 125.74     |
| VIC                   | 44.58   | 64.51   | 92.52     | 98.48      |
| WaterGAP              | 25.61   | 33.36   | 47.67     | 51.41      |
| WBM                   | 34.66   | 37.03   | 44.72     | 45.55      |

## Reference:

- Bentsen, M., Bethke, I., Debernard, J. B., Iversen, T., Kirkevåg, A., Seland, Ø., Drange, H., Roelandt, C., Seierstad, I. A., Hoose, C., and Kristjansson, J. E.: The Norwegian Earth System Model, NorESM1-M – part 1: Description and basic evaluation of the physical climate, *Geosci. Model Dev.*, 6, 687-720, 2013.
- Bondeau, A., Smith, P. C., Zaehle, S., Schaphoff, S., Lucht, W., Cramer, W., Gerten, D., Lotze-Campen, H., Müller, C., Reichstein, M., and Smith, B.: Modelling the role of agriculture for the 20<sup>th</sup> century global terrestrial carbon balance, *Glob. Change Biol.*, 13, 679-706, 2007.
- Deryng, D., Sacks, W. J., Barford, C. C., and Ramankutty, N.: Simulating the effects of climate and agricultural management practices on global crop yield, *Global Biogeochem. Cy.*, 25(2), GB2006, doi: 10.1029/2009GB003765, 2011.
- Döll, P., Hoffmann-Dobrev, H., Portmann, F. T., Siebert, S., Eicker, A., Rodell, M., Strassberg, G., and Scanlon, B. R.: Impact of water withdrawals from groundwater and surface water on continental water storage variations, *J. Geodyn.*, 59-60, 143-156, 2012.
- Dunne, J. P., John, J. G., Adcroft, A. J., Griffies, S. M., Hallberg, R. W., Shevliakova, E., Stouffer, R. J., Cooke, W., Dunne, K. A., Harrison, M. J., Krasting, J. P., Malyshev, S. L., Milly, P. C. D., Phillips, P. J., Sentman, L. T., Samuels, B. L., Spelman, M. J., Winton, M., Wittenberg, A. T., and Zadeh, N.: GFDL's ESM2 global coupled climate-carbon earth system models, part 1: Physical formulation and baseline simulation characteristics, *J. Climate*, 25, 6646-6665, 2012.
- Dunne, J. P., John, J. G., Shevliakova, E., Stouffer, R. J., Krasting, J. P., Malyshev, S. L., Milly, P. C. D., Sentman, L. T., Adcroft, A. J., Cooke, W., Dunne, K. A., Griffies, S. M., Hallberg, R. W., Harrison, M. J., Levy, H., Wittenberg, A. T., Phillips, P. J., and Zadeh, N.: GFDL's ESM2 global coupled climate-carbon earth system models, part 2: Carbon system formulation and baseline simulation characteristics, *J. Climate*, 26, 2247-2267, 2013.
- Elliott, J., Kelly, D., Chryssanthacopoulos, J., Glotter, M., Jhunhnuwala, K., Best, N., Wilde, M., and Foster, I.: The Parallel System for Integrating Impact Models and Sectors (pSIMS), *Environ. Modell. Softw.*, 62, 509-516, 2013.
- Fader, M., Rost, S., Müller, C., Bondeau, A., and Gerten, D.: Virtual water content of temperate cereals and maize: Present and potential future patterns, *J. Hydrol.*, 384, 218-231, 2010.
- Flörke M., Kynast, E., Barlund, I., Eisner, S., Wimmer, F., and Alcamo, J.: Domestic and industrial water uses of the past 60 years as a mirror of socio-economic development: A global simulation study, *Global Environ. Chang.*, 23, 144-156, 2013.
- Hagemann, S., and Dümenil, G. L.: Improving a subgrid runoff parameterization scheme for climate models by the use of high resolution data derived from satellite observations, *Clim. Dynam.*, 21, 349-359, 2003.
- Hanasaki, N., Kanae, S., Oki, T., Masuda, K., Motoya, K., Shirakawa, N., Shen, Y., and Tanaka, K.: An integrated model for the assessment of global water resources – Part 1: Model description and input meteorological forcing, *Hydrol. Earth Syst. Sc.*, 12, 1007-1025, 2008a.
- Hanasaki, N., Kanae, S., Oki, T., Masuda, K., Motoya, K., Shirakawa, N., Shen, Y., and Tanaka, K.: An integrated model for the assessment of global water resources – Part 2: Applications and assessments, *Hydrol. Earth Syst. Sc.*, 12, 1027-1037, 2008b.
- Iversen, T., Bentsen, M., Bethke, I., Debernard, J. B., Kirkevåg, A., Seland, O., Drange, H., Kristjansson, J. E., Medhaug, I., Sand, M., and Seierstad, I. A.: The Norwegian Earth System Model, NorESM1-M – part 2: Climate response and scenario projections, *Geosci. Model Dev.*, 6, 389-415, 2013.
- Izaurrealde, R. C., Williams, J. R., McGill, W. B., Rosenberg, N. J., and Quiroga-Jakas, M. C.: Simulating soil C dynamics with EPIC: Model description and testing against long-term data, *Ecol. Model.*, 192(3-4), 362-384,



2006.

Jones, C. D., Huges, J. K., Bellouin, N., Hardiman, S. C., Jones, G. S., Knight, J., Liddicoat, S., O'Connor, F. M., Andres, R. J., Bell, C., Boo, K., Bozzo, A., Butchart, N., Cadule, P., Corbin, K. D., Doutriaux-Boucher, M., Friedlingstein, P., Gornall, J., Gary, L., Halloran, P. R., Hurtt, G., Ingram, W. J., Lanarque, J. F., Law, R. M., Meinshausen, M., Osprey, S., Palin, E. J., Chini, L., Raddatz, T., Sanderson, M. G., Sellar, A. A., Schurer, A., Valdes, P., Wood, N., Woodward, S., Yoshioka, M., and Zerroukat, M.: The HadGEM2-ES implementation of CMIP5 centennial simulations, *Geosci. Model Dev.*, 4, 543-570, 2011.

Jones, J.W., Hoogenboom, G., Porter, C. H., Boote, K. J., Batchelor, W. D., Hunt, L. A., Wilkens, P. W., Singh, U., Gijssman, A., and Ritchie, J. T.: The DSSAT cropping system model, *Eur. J. Agron.*, 18, 235-265, 2003.

Liang, X., Lettenmaier, D. P., Wood, E. F., and Burges, S. J.: A simple hydrologically based model of land surface water and energy fluxes for general circulation models, *J. Geophys. Res.*, 99, 14415-14428, 1994.

Liu, J., Williams, J. R., Zehnder, A. J. B., and Hong, Y.: GEPIC—modelling wheat yield and crop water productivity with high resolution on a global scale, *Agr. Syst.*, 94(2), 478-493, 2007.

Lohmann, D., and Raschke, E.: Regional scale hydrology: I. Formulation of the VIC-2L model coupled to a routing model, *Hydrolog. Sci. J.*, 43, 131-141, 1998.

Mignot, J., and Bony, S.: Presentation and analysis of the IPSL and CNRM climate models used in CMIP5, *Clim. Dynam.*, 40(9), 2089-2089, 2013.

Smith, B., Prentice, I. C., and Sykes, M. T.: Representation of vegetation dynamics in the modelling of terrestrial ecosystems: Comparing two contrasting approaches within European climate space, *Global Ecol. Biogeogr.*, 10, 621-637, 2001.

Stacke, T., and Hagemann, S.: Development and validation of a global dynamical wetlands extent scheme, *Hydrol. Earth Syst. Sc.*, 9, 405-440, 2012.

Van Beek, L., Wada, Y., and Bierkens, M. F. P.: Global monthly water stress: 1. Water balance and water availability, *Water Resour. Res.*, 47, W07517, doi: 10.1029/2010WR009791, 2011.

Vörösmarty, C. J., Federer, C. A., and Schloss, A. L.: Potential evaporation functions compared on US watersheds: Possible implications for global-scale water balance and terrestrial ecosystem modeling, *J. Hydrol.*, 207, 147-169, 1998.

Wada, Y., van Beek, L., van Kempen, C., Reckman, J., Vasak, S., and Bierkens, M.: Global depletion of groundwater resources, *Geophys. Res. Lett.*, 37, L20402, doi: 10.1029/1010GL044571, 2010.

Wada, Y., van Beek, L., Viviroli, D., Duee, H. H., Weingartner, R., and Bierkens, M.: Global monthly water stress: 2 Water demand and severity of water stress, *Water Resour. Res.*, 47, W07518, doi: 10.1029/2010WR009792, 2011.

Watanabe, S., Hajima, T. Sudo, K., Nagashima, T., Takemura, T., Okajima, H., Nozawa, T., Kawase, H., Abe, M., Yokohata, T., Ise, T., Sato, H., Kato, E., Takata, K., Emori, S., and Kawamiya, M.: MIROC-ESM 2010: Model description and basic results of CMIP5-20c3m experiments, *Geosci. Model Dev.*, 4, 845-872, 2011.

Williams, J.R.: The EPIC. In: Singh, V.P. (Ed.). *Computer Models of Watershed Hydrology Water Resources Publications*. Littleton, CO. pp. 909-1000 (Chapter 25), 1995.

Williams, J. R.: EPIC-Erosion/Productivity Impact Calculator. United States Department of Agriculture Agricultural Research Service. Technical Bulletin Number 1768. Springfield, VA, 1990.

Wisser, D., Fekete, B. M., Vorosmarty, C. J., and Schumann, A. H.: Reconstructing 20<sup>th</sup> century global hydrography: A contribution to the Global Terrestrial Network- Hydrology (GTN-H), *Hydrol. Earth Syst. Sc.*, 14, 1-24, 2010.
